# Supplementary material
Source: Springer Nature journal article supplement (https://www.springermedizin.de/resource/supplementary/12865_2009_273_MOESM1_ESM.pdf/9427652)
Supplement: MOESM1 [file 9427652]

**A**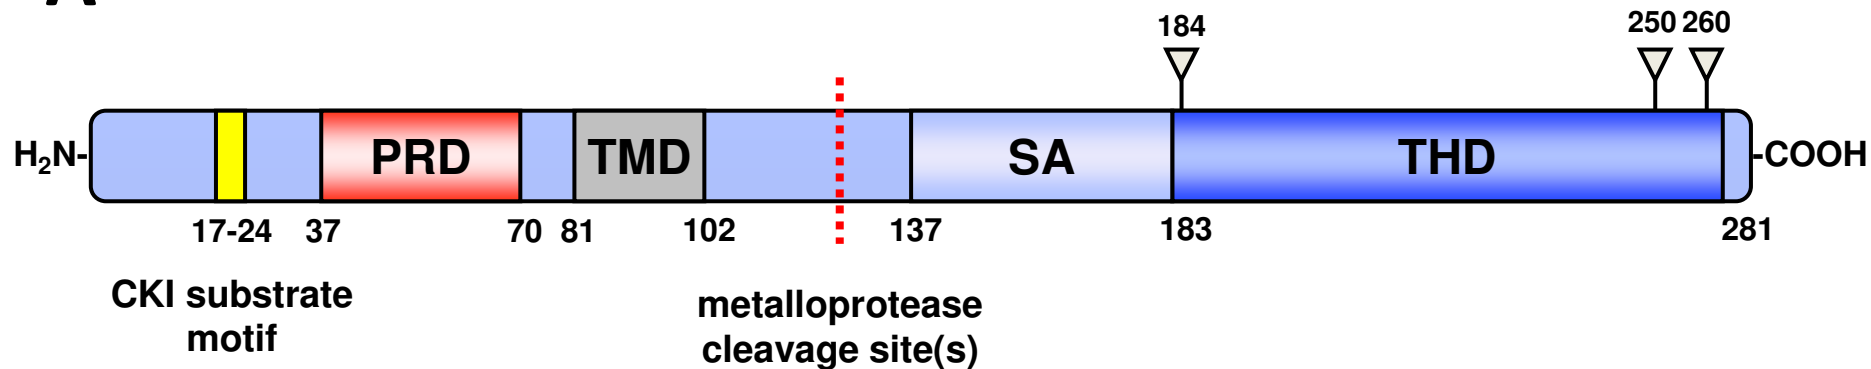**B**

human FasL

1 11 21 31 41 51 61 71  
 MQQPFNYPYP QIYWVDSSAS SPWAPP GTVL PCPTSVPRRP GQRRPPPPPP PPPLPPPPPP PPLPPLPLPP LK

mouse FasL

1 11 21 31 41 51 61 71  
 MQQPMNYPYCP QIFWVDSSAT SSWAPPGSVF PCPSCGPRGP DQRRPPPPPP PVSPLPPPSQ PLPLPPLTPL KKKI
